# Supplementary material for: Assessment of OCT-Based Macular Curvature and Its Relationship with Macular Microvasculature in Children with Anisomyopia
Source: Springer Nature journal article supplement (doi:10.1007/s40123-024-00956-5), 2024-05-14
Supplement: MOESM1 [file 27090736]

**Assessment of OCT-based macular curvature and its relationship  
with macular microvasculature in children with anisomyopia**

Yue Wu<sup>12</sup>, Xin Liu<sup>12</sup>, Yuying Liu<sup>12</sup>, Wenzhe Qian<sup>12</sup>, Liandi Huang<sup>12</sup>,  
Yixiang Wu<sup>12</sup>, Xuotong Wang<sup>12</sup>, Ying Yuan<sup>12</sup>, Bilian Ke<sup>13</sup>

- 1 Department of Ophthalmology, Shanghai General Hospital, Shanghai Jiao Tong University School of Medicine, Shanghai, China
- 2 National Clinical Research Center for Eye Diseases, Shanghai, China.
- 3 Department of Ophthalmology, Renji Hospital Affiliated to Shanghai Jiaotong University School of Medicine, Shanghai, China

**Corresponding author:** Bilian Ke, E-mail: kebilian@126.com

Department of Ophthalmology, Shanghai General Hospital, Shanghai Jiao  
Tong University School of Medicine, Shanghai, China. Phone numbers:  
021-63240090

**Address:** No. 100 Haining Road, Hongkou District, Shanghai

**- Supplementary Material -**

**Supplementary Table 1. Demographic and general ocular parameters of eyes in children with anisomyopia.**

| Parameter | Sample size | More myopic eyes | Contralateral eyes | P value |
|-----------|-------------|------------------|--------------------|---------|
| SER       | 52          | -2.94±1.49       | -0.36±1.57         | <0.001  |
| CR        | 52          | 42.93±1.47       | 42.92±1.46         | 0.814   |
| CCT       | 52          | 548.92±31.16     | 547.62±31.13       | 0.260   |
| ACD       | 52          | 3.27±0.25        | 3.19±0.27          | <0.001  |
| AL        | 52          | 24.68±0.95       | 23.60±1.01         | <0.001  |
| IOP       | 52          | 17.09±2.01       | 17.38±2.70         | 0.490   |

P value determined by Paired t-test.

SER: spherical equivalent refraction; CR: corneal radius; CCT: central corneal thickness; ACD: anterior chamber depth; AL: axial length; IOP: intraocular pressure.

**Supplementary Table 2. Morphological and vascular parameters of the macular region in the more myopic eyes and less myopic eyes among children with anisomyopia.**

| Parameter                                                    | More myopic eyes | Less myopic eyes | p <sup>a</sup>   |
|--------------------------------------------------------------|------------------|------------------|------------------|
| Retinal thickness (RT) (um)                                  |                  |                  |                  |
| 1-mm diameter circle                                         | 255.88±17.12     | 259.38±14.96     | <b>&lt;0.001</b> |
| 3-mm diameter circle                                         | 328.49±12.72     | 335.01±13.6      | <b>&lt;0.001</b> |
| 6-mm diameter circle                                         | 296.93±10.55     | 303.01±11.47     | <b>&lt;0.001</b> |
| Choroidal thickness (ChT) (um)                               |                  |                  |                  |
| 1-mm diameter circle                                         | 283.43±73.32     | 387.13±82.09     | <b>&lt;0.001</b> |
| 3-mm diameter circle                                         | 283.98±69.75     | 378.47±79.01     | <b>&lt;0.001</b> |
| 6-mm diameter circle                                         | 275.51±59.43     | 355.23±68.48     | <b>&lt;0.001</b> |
| Radical peripapillary capillary plexus (RPCP) vessel density |                  |                  |                  |
| 1-mm diameter circle                                         | /                | /                | /                |
| 3-mm diameter circle                                         | 3.07±1.41        | 2.96±1.43        | 0.412            |
| 6-mm diameter circle                                         | 18.27±2.06       | 17.67±2.83       | 0.067            |
| Superficial vascular plexus (SVP) vessel density             |                  |                  |                  |
| 1-mm diameter circle                                         | 11.62±4.23       | 12.12±4.17       | 0.230            |
| 3-mm diameter circle                                         | 46.78±4.79       | 47.5±4.72        | 0.260            |
| 6-mm diameter circle                                         | 40.62±3.40       | 41.35±3.15       | 0.106            |
| Intermediate capillary plexus (ICP) vessel density           |                  |                  |                  |
| 1-mm diameter circle                                         | 18.61±6.25       | 20.59±5.63       | <b>0.005</b>     |
| 3-mm diameter circle                                         | 31.68±4.93       | 33.97±3.51       | <b>0.005</b>     |
| 6-mm diameter circle                                         | 27.08±4.33       | 29.51±3.83       | <b>&lt;0.001</b> |
| Deep capillary plexus (DCP) vessel density                   |                  |                  |                  |
| 1-mm diameter circle                                         | 1.87±2.36        | 2.22±2.33        | 0.184            |
| 3-mm diameter circle                                         | 5.62±3.39        | 8.0±3.76         | <b>&lt;0.001</b> |
| 6-mm diameter circle                                         | 8.17±4.03        | 11.67±4.55       | <b>&lt;0.001</b> |
| Choriocapillaris (CC) vessel density                         |                  |                  |                  |
| 1-mm diameter circle                                         | 83.54±5.95       | 82.10±4.01       | 0.106            |
| 3-mm diameter circle                                         | 78.69±2.94       | 78.20±3.20       | 0.356            |
| 6-mm diameter circle                                         | 75.71±1.44       | 76.18±1.85       | 0.061            |

**Supplementary Table 3. Correlation between the macular curvature index, retinal and choroidal microvasculature in 6-mm circle region**

| <b>Parameter</b>      |                | <b>RPCP</b> | <b>SVP</b> | <b>ICP</b> | <b>DCP</b> | <b>CC</b> |
|-----------------------|----------------|-------------|------------|------------|------------|-----------|
| <b>Horizontal MCI</b> | <b>r</b>       | 0.178       | -0.060     | -0.183     | -0.377     | -0.047    |
|                       | <b>P value</b> | 0.070       | 0.542      | 0.063      | 0.000      | 0.637     |
|                       | <b>P*value</b> | 0.790       | 0.887      | 0.699      | 0.003      | 0.900     |
| <b>Vertical MCI</b>   | <b>r</b>       | 0.103       | -0.008     | -0.218     | -0.237     | -0.148    |
|                       | <b>P value</b> | 0.300       | 0.938      | 0.026      | 0.015      | 0.135     |
|                       | <b>P*value</b> | 0.613       | 0.762      | 0.223      | 0.126      | 0.186     |
| <b>Average MCI</b>    | <b>r</b>       | 0.151       | -0.037     | -0.213     | -0.329     | -0.102    |
|                       | <b>P value</b> | 0.127       | 0.708      | 0.030      | 0.001      | 0.304     |
|                       | <b>P*value</b> | 0.677       | 0.929      | 0.386      | 0.016      | 0.432     |

RPCP: radical peripapillary capillary plexus; SVP: superficial vascular plexus; ICP: intermediate capillary plexus; DCP: deep capillary plexus; CC: Choriocapillaris; MCI: macular curvature index.

P value: Pearson's correlation

P\*value: Pearson's correlation adjusted for AL.
